# Supplementary material for: Isosteric O/S exchange in carbonyl(thio)ureides: molecular interactions, structure, and bioactivity assays
Source: Royal Society of Chemistry journal article supplement (doi:10.1039/d3nj02529b), 2023-01-01
Supplement: d3nj02529b1.pdf [file d3nj02529b1.pdf]

## Supplementary Information

# Isosteric O/S exchange in carbonyl(thio)ureides: molecular interactions, structure, and bioactivity assays

Elizabeth Contreras Aguilar,<sup>1</sup> E. Espitia Cogollo,<sup>1</sup> G. A. Echeverría,<sup>2</sup> O. E. Piro,<sup>2</sup> J. L. Jios,<sup>3\*</sup>  
S. E. Ulic,<sup>1,4\*</sup> R.D.I. Molina<sup>5</sup> and M.E. Arena<sup>5</sup>

<sup>1</sup>CEQUINOR (CONICET-UNLP), Facultad de Ciencias Exactas, Universidad Nacional de La Plata, Bv. 120 N°

1465, (1900) La Plata, República Argentina.

<sup>2</sup>Departamento de Física, Facultad de Ciencias Exactas, Universidad Nacional de La Plata e IFLP (CONICET, CCT-La Plata), C, C, 67, 1900 La Plata, Argentina.

<sup>3</sup>Laboratorio UPL (UNLP-CIC), Campus Tecnológico Gonnet (CIC-BA), Cno. Centenario e/505 y 508, (1897) Gonnet, Argentina.

<sup>4</sup>Departamento de Ciencias Básicas, Universidad Nacional de Luján, Rutas 5 y 7, (6700) Luján, Buenos Aires, República Argentina.

<sup>5</sup>INBIOFAL-CONICET (Instituto de Biotecnología Farmacéutica y Alimentaria) Universidad Nacional de Tucumán, Argentina

## Crystallographic Supplementary Information

**Table S1.** Crystal data and structure refinement results for compounds I and II.

| Compound                                      | I                                                               | II                                                            |
|-----------------------------------------------|-----------------------------------------------------------------|---------------------------------------------------------------|
| Chemical formula                              | C <sub>13</sub> H <sub>18</sub> N <sub>2</sub> O <sub>2</sub> S | C <sub>13</sub> H <sub>18</sub> N <sub>2</sub> O <sub>3</sub> |
| Formula weight                                | 266.35                                                          | 250.29                                                        |
| Temperature (K)                               | 297(2)                                                          | 297(2)                                                        |
| Wavelength (Å)                                | 0.71073                                                         | 0.71073                                                       |
| Crystal system                                | Monoclinic                                                      | Monoclinic                                                    |
| Space group                                   | <i>P</i> 2 <sub>1</sub> / <i>c</i>                              | <i>P</i> 2 <sub>1</sub> / <i>c</i>                            |
| Unit cell dimensions:                         |                                                                 |                                                               |
| <i>a</i> (Å)                                  | 6.3789(3)                                                       | 4.8639(2)                                                     |
| <i>b</i> (Å)                                  | 23.739(1)                                                       | 15.2441(7)                                                    |
| <i>c</i> (Å)                                  | 9.2761(5)                                                       | 18.5621(8)                                                    |
| $\beta$ (°)                                   | 98.122(5)                                                       | 96.637(4)                                                     |
| Volume (Å <sup>3</sup> )                      | 1390.6(1)                                                       | 1367.1(1)                                                     |
| <i>Z</i>                                      | 4                                                               | 4                                                             |
| Density (calculated, Mg/m <sup>3</sup> )      | 1.272                                                           | 1.216                                                         |
| Absorption coeff. (mm <sup>-1</sup> )         | 0.229                                                           | 0.087                                                         |
| <i>F</i> (000)                                | 568                                                             | 536                                                           |
| Crystal color                                 | Colorless                                                       | Colorless                                                     |
| Crystal size (mm <sup>3</sup> )               | 0.324 x 0.078 x 0.061                                           | 0.402 x 0.110 x 0.079                                         |
| $\theta$ -range (°) for data collection       | 3.226 to 28.752                                                 | 3.468 to 29.025                                               |
| Index ranges                                  | -8 ≤ <i>h</i> ≤ 8, -13 ≤ <i>k</i> ≤ 30, -12 ≤ <i>l</i> ≤ 10     | -6 ≤ <i>h</i> ≤ 6, -20 ≤ <i>k</i> ≤ 20, -23 ≤ <i>l</i> ≤ 24   |
| Reflections collected                         | 5746                                                            | 12946                                                         |
| Independent reflections                       | 3009 [ <i>R</i> (int) = 0.0362]                                 | 3150 [ <i>R</i> (int) = 0.0446]                               |
| Obs. reflections [ <i>I</i> > 2σ( <i>I</i> )] | 1932                                                            | 1672                                                          |
| Completeness (%)                              | 99.9 (to $\theta$ = 25.242°)                                    | 99.8 (to $\theta$ = 25.242°)                                  |
| Refinement method                             | Full-matrix least-squares on <i>F</i> <sup>2</sup>              | Full-matrix least-squares on <i>F</i> <sup>2</sup>            |
| Data / restraints / parameters                | 3009 / 0 / 235                                                  | 3159 / 3 / 165                                                |

|                                                     |                                |                                |
|-----------------------------------------------------|--------------------------------|--------------------------------|
| Goodness-of-fit on $F^2$                            | 1.027                          | 1.027                          |
| Final $R$ indices <sup>a</sup> [ $I > 2\sigma(I)$ ] | $R1 = 0.0515$ , $wR2 = 0.1021$ | $R1 = 0.0785$ , $wR2 = 0.2118$ |
| $R$ indices (all data)                              | $R1 = 0.0937$ , $wR2 = 0.1205$ | $R1 = 0.1448$ , $wR2 = 0.2587$ |
| Larg. diff. peak / hole ( $e.\text{\AA}^{-3}$ )     | 0.161 / -0.239                 | 0.472 / -0.335                 |

$$^a R1 = \sum ||F_o| - |F_c|| / \sum |F_o|, wR2 = [\sum w(|F_o|^2 - |F_c|^2)^2 / \sum w(|F_o|^2)]^{1/2}$$

**Table S2.** Bond lengths [ $\text{\AA}$ ] and angles [ $^\circ$ ] in compound (I).

|                   |          |
|-------------------|----------|
| C(1)-O(1)         | 1.361(2) |
| C(1)-C(6)         | 1.378(3) |
| C(1)-C(2)         | 1.379(3) |
| C(2)-C(3)         | 1.373(3) |
| C(3)-C(4)         | 1.389(3) |
| C(4)-C(5)         | 1.379(3) |
| C(4)-C(8)         | 1.482(3) |
| C(5)-C(6)         | 1.377(3) |
| C(7)-O(1)         | 1.416(3) |
| C(8)-O(2)         | 1.224(2) |
| C(8)-N(1)         | 1.369(3) |
| C(9)-N(2)         | 1.319(3) |
| C(9)-N(1)         | 1.394(3) |
| C(9)-S            | 1.665(2) |
| C(10)-N(2)        | 1.458(3) |
| C(10)-C(11)       | 1.506(3) |
| C(11)-C(12)       | 1.525(3) |
| C(12)-C(13)       | 1.510(4) |
| O(1)-C(1)-C(6)    | 124.8(2) |
| O(1)-C(1)-C(2)    | 115.5(2) |
| C(6)-C(1)-C(2)    | 119.7(2) |
| C(3)-C(2)-C(1)    | 120.5(2) |
| C(2)-C(3)-C(4)    | 120.5(2) |
| C(5)-C(4)-C(3)    | 118.2(2) |
| C(5)-C(4)-C(8)    | 117.8(2) |
| C(3)-C(4)-C(8)    | 123.9(2) |
| C(6)-C(5)-C(4)    | 121.6(2) |
| C(1)-C(6)-C(5)    | 119.5(2) |
| O(2)-C(8)-N(1)    | 121.5(2) |
| O(2)-C(8)-C(4)    | 121.4(2) |
| N(1)-C(8)-C(4)    | 117.1(2) |
| N(2)-C(9)-N(1)    | 116.4(2) |
| N(2)-C(9)-S       | 124.4(2) |
| N(1)-C(9)-S       | 119.1(2) |
| N(2)-C(10)-C(11)  | 110.7(2) |
| C(10)-C(11)-C(12) | 111.4(2) |
| C(13)-C(12)-C(11) | 113.0(3) |
| C(8)-N(1)-C(9)    | 128.8(2) |
| C(9)-N(2)-C(10)   | 123.9(2) |
| C(1)-O(1)-C(7)    | 118.4(2) |

**Table S3.** Bond lengths [Å] and angles [°] in compound II.

|                   |           |
|-------------------|-----------|
| C(1)-O(1)         | 1.363(4)  |
| C(1)-C(2)         | 1.378(5)  |
| C(1)-C(6)         | 1.372(4)  |
| C(2)-C(3)         | 1.371(5)  |
| C(3)-C(4)         | 1.385(4)  |
| C(4)-C(5)         | 1.374(4)  |
| C(4)-C(8)         | 1.481(4)  |
| C(5)-C(6)         | 1.381(4)  |
| C(7)-O(1)         | 1.419(4)  |
| C(8)-O(2)         | 1.222(3)  |
| C(8)-N(1)         | 1.371(3)  |
| C(9)-O(3)         | 1.232(3)  |
| C(9)-N(2)         | 1.320(4)  |
| C(9)-N(1)         | 1.393(4)  |
| C(10)-N(2)        | 1.443(4)  |
| C(10)-C(11)       | 1.490(7)  |
| C(11)-C(12)       | 1.361(10) |
| C(12)-C(13)       | 1.509(12) |
| O(1)-C(1)-C(2)    | 116.0(3)  |
| O(1)-C(1)-C(6)    | 124.7(3)  |
| C(2)-C(1)-C(6)    | 119.3(3)  |
| C(1)-C(2)-C(3)    | 120.7(3)  |
| C(2)-C(3)-C(4)    | 120.7(3)  |
| C(5)-C(4)-C(3)    | 117.9(3)  |
| C(5)-C(4)-C(8)    | 124.8(2)  |
| C(3)-C(4)-C(8)    | 117.3(3)  |
| C(6)-C(5)-C(4)    | 121.8(3)  |
| C(5)-C(6)-C(1)    | 119.6(3)  |
| O(2)-C(8)-N(1)    | 121.8(3)  |
| O(2)-C(8)-C(4)    | 121.2(2)  |
| N(1)-C(8)-C(4)    | 117.1(2)  |
| O(3)-C(9)-N(2)    | 123.3(3)  |
| O(3)-C(9)-N(1)    | 118.1(3)  |
| N(2)-C(9)-N(1)    | 118.5(2)  |
| N(2)-C(10)-C(11)  | 112.6(3)  |
| C(12)-C(11)-C(10) | 119.3(7)  |
| C(11)-C(12)-C(13) | 111.2(13) |
| C(8)-N(1)-C(9)    | 127.8(2)  |
| C(9)-N(2)-C(10)   | 122.0(3)  |
| C(1)-O(1)-C(7)    | 118.0(2)  |

**Table S4.** Torsion angles [°] in I.

|                     |            |
|---------------------|------------|
| O(1)-C(1)-C(2)-C(3) | 179.58(19) |
| C(6)-C(1)-C(2)-C(3) | -0.2(4)    |
| C(1)-C(2)-C(3)-C(4) | 0.0(3)     |
| C(2)-C(3)-C(4)-C(5) | 0.5(3)     |

|                         |             |
|-------------------------|-------------|
| C(2)-C(3)-C(4)-C(8)     | 177.69(19)  |
| C(3)-C(4)-C(5)-C(6)     | -0.8(3)     |
| C(8)-C(4)-C(5)-C(6)     | -178.1(2)   |
| O(1)-C(1)-C(6)-C(5)     | -179.8(2)   |
| C(2)-C(1)-C(6)-C(5)     | 0.0(4)      |
| C(4)-C(5)-C(6)-C(1)     | 0.6(4)      |
| C(5)-C(4)-C(8)-O(2)     | 13.0(3)     |
| C(3)-C(4)-C(8)-O(2)     | -164.2(2)   |
| C(5)-C(4)-C(8)-N(1)     | -168.2(2)   |
| C(3)-C(4)-C(8)-N(1)     | 14.7(3)     |
| N(2)-C(10)-C(11)-C(12)  | -174.2(2)   |
| C(10)-C(11)-C(12)-C(13) | 173.8(3)    |
| O(2)-C(8)-N(1)-C(9)     | 6.3(3)      |
| C(4)-C(8)-N(1)-C(9)     | -172.52(19) |
| N(2)-C(9)-N(1)-C(8)     | -1.2(3)     |
| S-C(9)-N(1)-C(8)        | 178.18(18)  |
| N(1)-C(9)-N(2)-C(10)    | -178.7(2)   |
| S-C(9)-N(2)-C(10)       | 2.0(3)      |
| C(11)-C(10)-N(2)-C(9)   | 164.5(2)    |
| C(6)-C(1)-O(1)-C(7)     | 0.8(4)      |
| C(2)-C(1)-O(1)-C(7)     | -179.0(3)   |

**Table S5.** Torsion angles [°] in II.

|                         |           |
|-------------------------|-----------|
| O(1)-C(1)-C(2)-C(3)     | 179.4(3)  |
| C(6)-C(1)-C(2)-C(3)     | -0.5(5)   |
| C(1)-C(2)-C(3)-C(4)     | 0.9(6)    |
| C(2)-C(3)-C(4)-C(5)     | -0.4(5)   |
| C(2)-C(3)-C(4)-C(8)     | -179.6(3) |
| C(3)-C(4)-C(5)-C(6)     | -0.7(4)   |
| C(8)-C(4)-C(5)-C(6)     | 178.4(3)  |
| C(4)-C(5)-C(6)-C(1)     | 1.2(5)    |
| O(1)-C(1)-C(6)-C(5)     | 179.6(3)  |
| C(2)-C(1)-C(6)-C(5)     | -0.6(5)   |
| C(5)-C(4)-C(8)-O(2)     | -159.4(3) |
| C(3)-C(4)-C(8)-O(2)     | 19.8(4)   |
| C(5)-C(4)-C(8)-N(1)     | 20.4(4)   |
| C(3)-C(4)-C(8)-N(1)     | -160.5(3) |
| N(2)-C(10)-C(11)-C(12)  | 167.8(8)  |
| C(10)-C(11)-C(12)-C(13) | -173.9(8) |
| O(2)-C(8)-N(1)-C(9)     | -4.3(5)   |
| C(4)-C(8)-N(1)-C(9)     | 176.0(3)  |
| O(3)-C(9)-N(1)-C(8)     | -173.9(3) |
| N(2)-C(9)-N(1)-C(8)     | 5.2(4)    |
| O(3)-C(9)-N(2)-C(10)    | 2.7(5)    |
| N(1)-C(9)-N(2)-C(10)    | -176.3(3) |
| C(11)-C(10)-N(2)-C(9)   | -85.9(5)  |
| C(2)-C(1)-O(1)-C(7)     | 177.1(3)  |
| C(6)-C(1)-O(1)-C(7)     | -3.1(5)   |

**Table S6.** Atomic coordinates ( $\times 10^4$ ) and equivalent isotropic displacement parameters ( $\text{\AA}^2 \times 10^3$ ) for (I).  $U(\text{eq})$  is defined as one third of the trace of the orthogonalized  $U_{ij}$  tensor.

| Atom  | x        | y       | z        | U(eq) |
|-------|----------|---------|----------|-------|
| C(1)  | -2264(3) | 3351(1) | 5560(2)  | 46(1) |
| C(2)  | -1679(3) | 3906(1) | 5446(3)  | 45(1) |
| C(3)  | 2(3)     | 4047(1) | 4742(2)  | 42(1) |
| C(4)  | 1141(3)  | 3632(1) | 4136(2)  | 39(1) |
| C(5)  | 524(3)   | 3079(1) | 4251(3)  | 50(1) |
| C(6)  | -1155(4) | 2934(1) | 4959(3)  | 54(1) |
| C(7)  | -4602(5) | 2697(1) | 6465(5)  | 73(1) |
| C(8)  | 2922(3)  | 3750(1) | 3314(2)  | 42(1) |
| C(9)  | 5283(3)  | 4518(1) | 2670(2)  | 41(1) |
| C(10) | 7650(4)  | 4366(1) | 842(3)   | 53(1) |
| C(11) | 8586(4)  | 3863(1) | 176(3)   | 48(1) |
| C(12) | 10431(4) | 4033(1) | -612(3)  | 54(1) |
| C(13) | 11563(5) | 3534(1) | -1155(4) | 63(1) |
| N(1)  | 3773(3)  | 4280(1) | 3434(2)  | 44(1) |
| N(2)  | 6034(3)  | 4191(1) | 1714(2)  | 48(1) |
| O(1)  | -3943(2) | 3259(1) | 6288(2)  | 64(1) |
| O(2)  | 3581(2)  | 3392(1) | 2543(2)  | 58(1) |
| S     | 6003(1)  | 5186(1) | 2994(1)  | 55(1) |

**Table S7.** Atomic coordinates ( $\times 10^4$ ) and equivalent isotropic displacement parameters ( $\text{\AA}^2 \times 10^3$ ) for (II).  $U(\text{eq})$  is defined as one third of the trace of the orthogonalized  $U_{ij}$  tensor.

| Atom  | x         | y       | z       | U(eq)   |
|-------|-----------|---------|---------|---------|
| C(1)  | 8807(6)   | 3606(2) | 7308(2) | 61(1)   |
| C(2)  | 7581(8)   | 4112(3) | 7798(2) | 82(1)   |
| C(3)  | 5698(7)   | 4749(3) | 7562(2) | 77(1)   |
| C(4)  | 4957(6)   | 4889(2) | 6828(1) | 54(1)   |
| C(5)  | 6179(6)   | 4374(2) | 6347(2) | 59(1)   |
| C(6)  | 8111(6)   | 3741(2) | 6579(2) | 60(1)   |
| C(7)  | 11887(8)  | 2433(3) | 7118(2) | 87(1)   |
| C(8)  | 2925(6)   | 5594(2) | 6620(2) | 57(1)   |
| C(9)  | -538(6)   | 6115(2) | 5624(2) | 55(1)   |
| C(10) | -3496(7)  | 7369(2) | 5742(2) | 75(1)   |
| C(11) | -2631(13) | 8081(4) | 5267(4) | 173(3)  |
| C(12) | -4600(30) | 8571(7) | 4873(6) | 299(7)  |
| C(13) | -3330(40) | 9189(6) | 4369(5) | 439(14) |
| N(1)  | 1562(5)   | 5563(2) | 5931(1) | 56(1)   |
| N(2)  | -1238(5)  | 6795(2) | 6003(1) | 64(1)   |
| O(1)  | 10668(5)  | 2998(2) | 7599(1) | 78(1)   |
| O(2)  | 2498(5)   | 6178(2) | 7044(1) | 79(1)   |
| O(3)  | -1671(5)  | 5936(2) | 5014(1) | 77(1)   |

**Table S8.** Anisotropic displacement parameters ( $\text{\AA}^2 \times 10^3$ ) for I. The anisotropic displacement factor exponent takes the form:  $-2\pi^2[h^2a^2U^{11} + \dots + 2hka^*b^*U^{12}]$ .

| Atom  | U <sup>11</sup> | U <sup>22</sup> | U <sup>33</sup> | U <sup>23</sup> | U <sup>13</sup> | U <sup>12</sup> |
|-------|-----------------|-----------------|-----------------|-----------------|-----------------|-----------------|
| C(1)  | 38(1)           | 49(2)           | 51(1)           | 3(1)            | 4(1)            | -4(1)           |
| C(2)  | 39(1)           | 42(1)           | 56(1)           | -4(1)           | 9(1)            | 2(1)            |
| C(3)  | 39(1)           | 35(1)           | 53(1)           | -2(1)           | 7(1)            | -2(1)           |
| C(4)  | 36(1)           | 38(1)           | 42(1)           | -4(1)           | 4(1)            | 0(1)            |
| C(5)  | 50(1)           | 38(1)           | 65(2)           | -5(1)           | 14(1)           | 0(1)            |
| C(6)  | 57(1)           | 36(1)           | 70(2)           | 2(1)            | 10(1)           | -9(1)           |
| C(7)  | 63(2)           | 64(2)           | 97(3)           | 17(2)           | 26(2)           | -11(2)          |
| C(8)  | 41(1)           | 38(1)           | 47(1)           | -6(1)           | 6(1)            | -1(1)           |
| C(9)  | 38(1)           | 43(1)           | 41(1)           | -3(1)           | 8(1)            | 0(1)            |
| C(10) | 62(2)           | 49(2)           | 51(2)           | -1(1)           | 24(1)           | 0(1)            |
| C(11) | 54(1)           | 47(2)           | 45(1)           | -4(1)           | 15(1)           | -2(1)           |
| C(12) | 62(2)           | 51(2)           | 53(2)           | 2(1)            | 23(1)           | 4(1)            |
| C(13) | 68(2)           | 64(2)           | 62(2)           | -2(2)           | 23(2)           | 11(2)           |
| N(1)  | 45(1)           | 40(1)           | 50(1)           | -14(1)          | 17(1)           | -4(1)           |
| N(2)  | 51(1)           | 46(1)           | 51(1)           | -10(1)          | 20(1)           | -7(1)           |
| O(1)  | 56(1)           | 59(1)           | 81(1)           | 6(1)            | 28(1)           | -10(1)          |
| O(2)  | 63(1)           | 44(1)           | 72(1)           | -19(1)          | 29(1)           | -7(1)           |
| S     | 71(1)           | 40(1)           | 61(1)           | -7(1)           | 28(1)           | -8(1)           |

**Table S9.** Anisotropic displacement parameters ( $\text{\AA}^2 \times 10^3$ ) for II.

| Atom  | U <sup>11</sup> | U <sup>22</sup> | U <sup>33</sup> | U <sup>23</sup> | U <sup>13</sup> | U <sup>12</sup> |
|-------|-----------------|-----------------|-----------------|-----------------|-----------------|-----------------|
| C(1)  | 61(2)           | 61(2)           | 59(2)           | 14(1)           | -5(1)           | -5(1)           |
| C(2)  | 100(3)          | 96(3)           | 48(2)           | 6(2)            | -5(2)           | 20(2)           |
| C(3)  | 93(2)           | 84(2)           | 51(2)           | -6(2)           | -5(2)           | 18(2)           |
| C(4)  | 56(2)           | 57(2)           | 47(2)           | 0(1)            | -4(1)           | -8(1)           |
| C(5)  | 61(2)           | 69(2)           | 44(2)           | 4(1)            | -2(1)           | -4(2)           |
| C(6)  | 60(2)           | 65(2)           | 55(2)           | 0(1)            | 2(1)            | 2(1)            |
| C(7)  | 84(2)           | 87(3)           | 88(3)           | 21(2)           | 10(2)           | 19(2)           |
| C(8)  | 59(2)           | 60(2)           | 51(2)           | -7(1)           | -3(1)           | -8(1)           |
| C(9)  | 63(2)           | 52(2)           | 49(2)           | -1(1)           | -2(1)           | -4(1)           |
| C(10) | 84(2)           | 63(2)           | 74(2)           | -1(2)           | -5(2)           | 11(2)           |
| C(11) | 158(5)          | 95(4)           | 243(8)          | 60(4)           | -71(5)          | 2(3)            |
| C(12) | 500(20)         | 170(9)          | 206(9)          | 83(8)           | -40(11)         | -3(12)          |
| C(13) | 1070(40)        | 131(7)          | 154(7)          | 62(6)           | 223(15)         | 62(14)          |
| N(1)  | 61(1)           | 55(1)           | 48(1)           | -7(1)           | -3(1)           | 2(1)            |
| N(2)  | 70(2)           | 61(2)           | 56(2)           | -9(1)           | -7(1)           | 7(1)            |
| O(1)  | 85(2)           | 79(2)           | 68(1)           | 18(1)           | -4(1)           | 14(1)           |
| O(2)  | 93(2)           | 78(2)           | 62(1)           | -23(1)          | -16(1)          | 15(1)           |
| O(3)  | 98(2)           | 71(2)           | 56(1)           | -12(1)          | -22(1)          | 16(1)           |

**Table S10.** Hydrogen coordinates ( $\times 10^4$ ) and isotropic displacement parameters ( $\text{\AA}^2 \times 10^3$ ) for I.

| Atom   | x         | y        | z         | U(eq)  |
|--------|-----------|----------|-----------|--------|
| H(1N)  | 3470(30)  | 4487(10) | 4040(20)  | 41(7)  |
| H(2)   | -2430(30) | 4178(11) | 5850(20)  | 63(7)  |
| H(2N)  | 5550(40)  | 3866(11) | 1670(30)  | 56(8)  |
| H(3)   | 320(30)   | 4431(10) | 4680(20)  | 40(6)  |
| H(5)   | 1220(30)  | 2793(11) | 3800(30)  | 63(7)  |
| H(6)   | -1500(30) | 2570(10) | 5050(20)  | 51(6)  |
| H(7A)  | -4990(40) | 2523(13) | 5530(30)  | 89(11) |
| H(7B)  | -5840(40) | 2737(13) | 6960(30)  | 89(9)  |
| H(7C)  | -3440(40) | 2475(13) | 6990(30)  | 91(10) |
| H(10A) | 8780(40)  | 4582(13) | 1500(30)  | 88(9)  |
| H(10B) | 7070(30)  | 4616(11) | 180(30)   | 59(8)  |
| H(11A) | 9060(30)  | 3594(10) | 880(30)   | 53(7)  |
| H(11B) | 7560(30)  | 3653(10) | -530(30)  | 58(7)  |
| H(12A) | 9920(30)  | 4294(11) | -1370(30) | 56(7)  |
| H(12B) | 11430(40) | 4274(12) | 30(30)    | 71(8)  |
| H(13A) | 12200(40) | 3301(12) | -400(30)  | 65(8)  |
| H(13B) | 10670(40) | 3311(13) | -1810(30) | 81(10) |
| H(13C) | 12720(50) | 3641(13) | -1640(30) | 97(10) |

**Table S11.** Hydrogen coordinates ( $\times 10^4$ ) and isotropic displacement parameters ( $\text{\AA}^2 \times 10^3$ ) for II.

| Atom   | x         | y       | z | U(eq) |
|--------|-----------|---------|---|-------|
| H(2)   | 80364021  | 829299  |   |       |
| H(3)   | 49095091  | 789993  |   |       |
| H(5)   | 56924455  | 585270  |   |       |
| H(6)   | 89353408  | 624373  |   |       |
| H(7A)  | 104702088 | 6849130 |   |       |
| H(7B)  | 131922053 | 7391130 |   |       |
| H(7C)  | 128222778 | 6788130 |   |       |
| H(10A) | -42527629 | 615490  |   |       |
| H(10B) | -49487025 | 547390  |   |       |
| H(11A) | -14528480 | 5571207 |   |       |
| H(11B) | -14937817 | 4930207 |   |       |
| H(12A) | -56178907 | 5199359 |   |       |
| H(12B) | -59028186 | 4591359 |   |       |
| H(13A) | -14469022 | 4339658 |   |       |
| H(13B) | -33849777 | 4552658 |   |       |
| H(13C) | -43579161 | 3896658 |   |       |
| H(1)   | 20635154  | 565667  |   |       |
| H(2A)  | -3206900  | 641976  |   |       |

**Table S12.** Main bond lengths [Å], angles [°] and torsion angles [°] for I and II.

| Bond/angles             | I           |         | II        |         |
|-------------------------|-------------|---------|-----------|---------|
|                         | Exp.        | Calc.   | Exp       | Calc.   |
| C(8)-O(2)               | 1.224(2)    | 1.2288  | 1.222(3)  | 1.2277  |
| C(8)-N(1)               | 1.369(3)    | 1.3828  | 1.371(3)  | 1.3794  |
| C(9)-N(2)               | 1.319(3)    | 1.3349  | 1.320(4)  | 1.3484  |
| C(9)-N(1)               | 1.394(3)    | 1.4064  | 1.393(4)  | 1.4264  |
| C(9)-S                  | 1.665(2)    | 1.6772  | ---       | ---     |
| C(9)-O(3)               | ---         | ---     | 1.232(3)  | 1.2209  |
| C(10)-N(2)              | 1.458(3)    | 1.4594  | 1.443(4)  | 1.4581  |
| C(10)-C(11)             | 1.506(3)    | 1.5277  | 1.490(7)  | 1.5337  |
| C(11)-C(12)             | 1.525(3)    | 1.5326  | 1.361(10) | 1.5323  |
| C(12)-C(13)             | 1.510(4)    | 1.5312  | 1.509(12) | 1.5314  |
| O(2)-C(8)-N(1)          | 121.5(2)    | 122.24  | 121.8(3)  | 122.37  |
| N(2)-C(9)-N(1)          | 116.4(2)    | 115.08  | 118.5(2)  | 115.76  |
| O(3)-C(9)-N(2)          | ---         | ---     | 123.3(3)  | 126.14  |
| N(2)-C(9)-S             | 124.4(2)    | 125.73  | ---       | ---     |
| O(3)-C(9)-N(1)          | ---         | ---     | 118.1(3)  | 118.10  |
| N(1)-C(9)-S             | 119.1(2)    | 118.18  | ---       | ---     |
| N(2)-C(10)-C(11)-C(12)  | -174.2(2)   | 179.91  | 167.8(8)  | 179.50  |
| C(10)-C(11)-C(12)-C(13) | 173.8(3)    | 170.92  | -173.9(8) | -179.86 |
| O(2)-C(8)-N(1)-C(9)     | 6.3(3)      | -3.38   | -4.3(5)   | -178.81 |
| C(4)-C(8)-N(1)-C(9)     | -172.52(19) | 177.21  | 176.0(3)  | -178.15 |
| N(2)-C(9)-N(1)-C(8)     | -1.2(3)     | -0.08   | 5.2(4)    | 1.83    |
| O(3)-C(9)-N(1)-C(8)     | ---         | ---     | -173.9(3) | -178.81 |
| S-C(9)-N(1)-C(8)        | 178.18(18)  | -179.92 | ---       | ---     |
| C(11)-C(10)-N(2)-C(9)   | 164.5(2)    | 177.70  | -85.9(5)  | 91.01   |
| O(3)-C(9)-N(2)-C(10)    | ---         | ---     | 2.7(5)    | 2.19    |
| S-C(9)-N(2)-C(10)       | 2.0(3)      | 0.18    | ---       | ---     |
| N(1)-C(9)-N(2)-C(10)    | -178.7(2)   | -179.64 | -176.3(3) | -178.51 |



**Table S13.** Stabilization energies for the **I** and **II** dimers, calculated by NBO (B3LYP/6-31g(d,p)).

| Dim. | Donor   |         | Acceptor | E <sup>(2)</sup>     |    |
|------|---------|---------|----------|----------------------|----|
|      | NBO (i) | NBO (j) |          | kJ mol <sup>-1</sup> |    |
|      |         |         |          | I                    | II |
| A    | Lp (S)  | →       | σ*N1-H   | 5.65                 |    |
| B    | Lp (S)  | →       | σ*C2-H   | 5.44                 |    |
| C    | Lp (O)  | →       | σ*C7-H   | 0.25                 |    |
| A    | Lp (O3) | →       | σ*N1-H   | 25.9                 |    |
|      | Lp (O3) | →       | σ*C5-H   | 2.85                 |    |
| B    | Lp (O2) | →       | σ*C7-H   | 2.72                 |    |
| C    | Lp (O1) | →       | σ*N2-H   | 4.60                 |    |

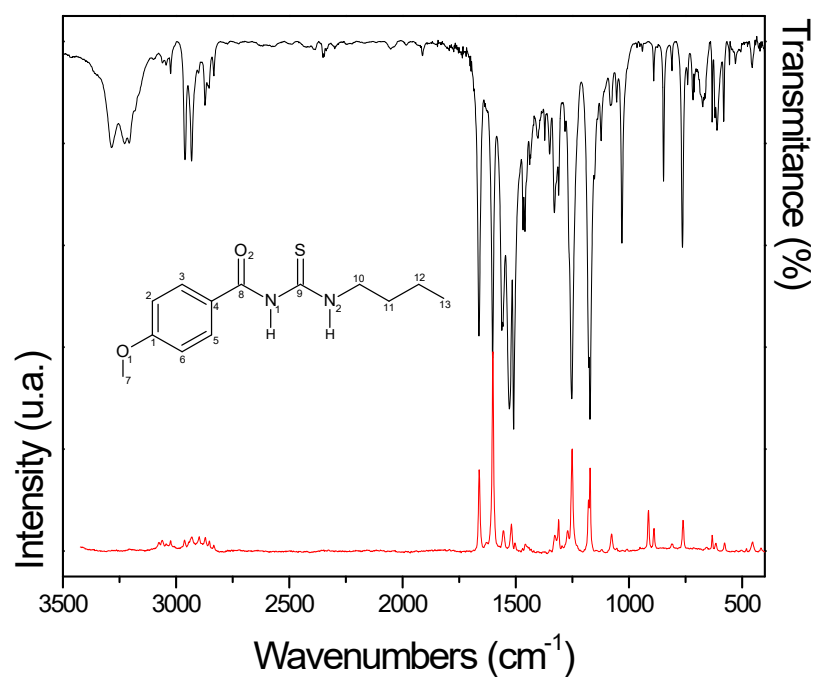

**Figure S1.** Infrared spectrum (upper trace, KBr pellets) and Raman spectrum (solid, lower trace) of **I**.

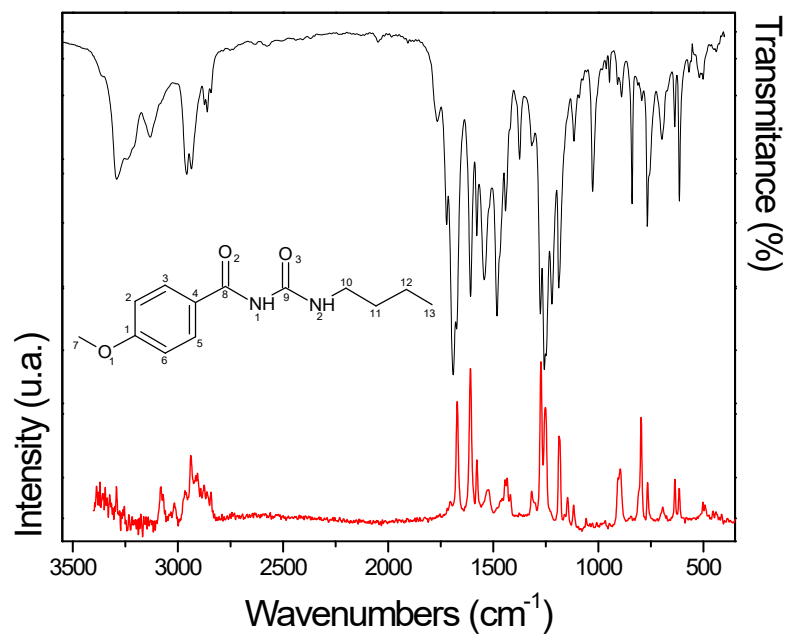

**Figure S2.** Infrared spectrum (upper trace, KBr pellets) and Raman spectrum (solid, lower trace) of II.

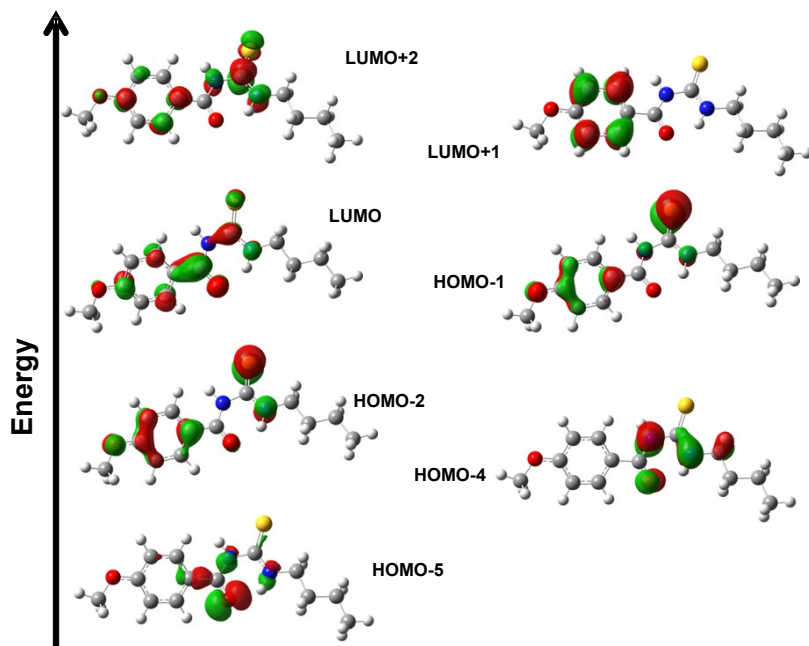

**Figure S3.** Calculated molecular orbitals for I.

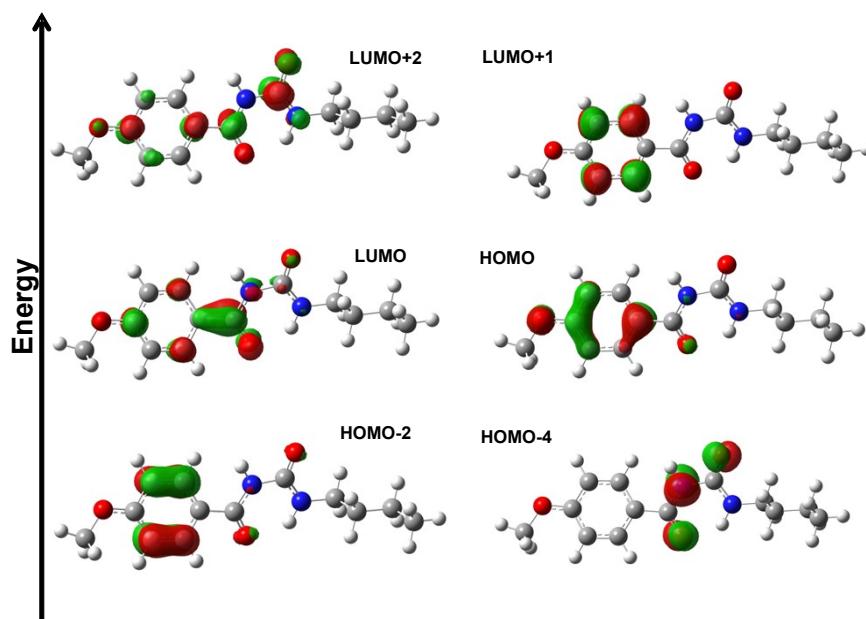

**Figure S4.** Calculated molecular orbitals for II.

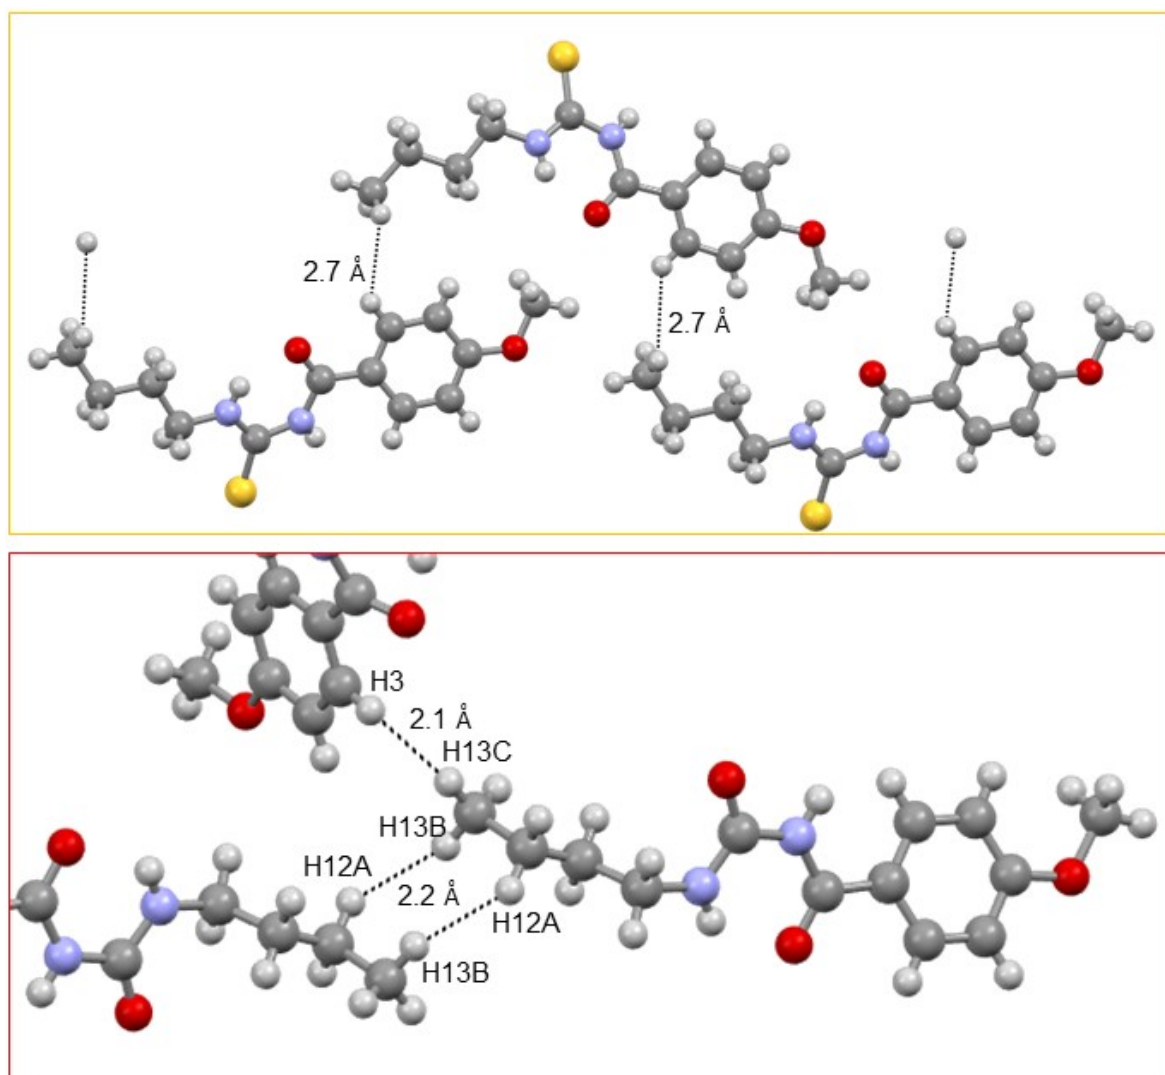

**Figure S5.** H...H contacts in I (top) and II (bottom).

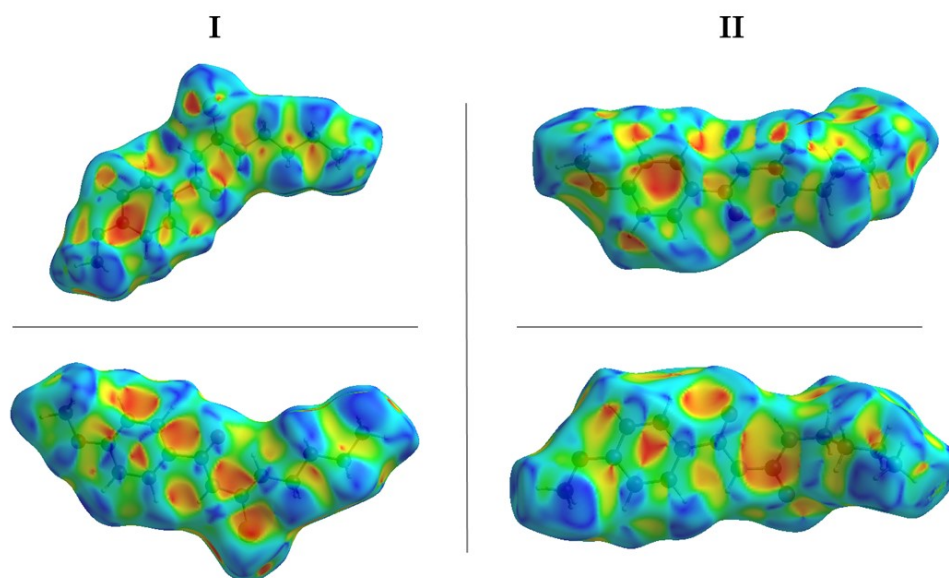

**Figure S6.** Anterior (top) and posterior (bottom) views of the Hirshfeld surface of **I** (left) and **II** (right) evaluated with the Shape Index descriptor.

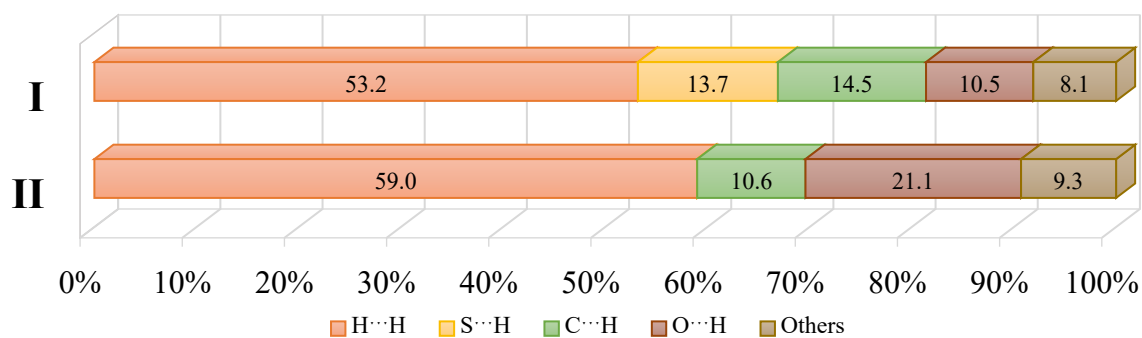

**Figure S7.** Contribution (%) of the intermolecular contacts of **I** and **II**.

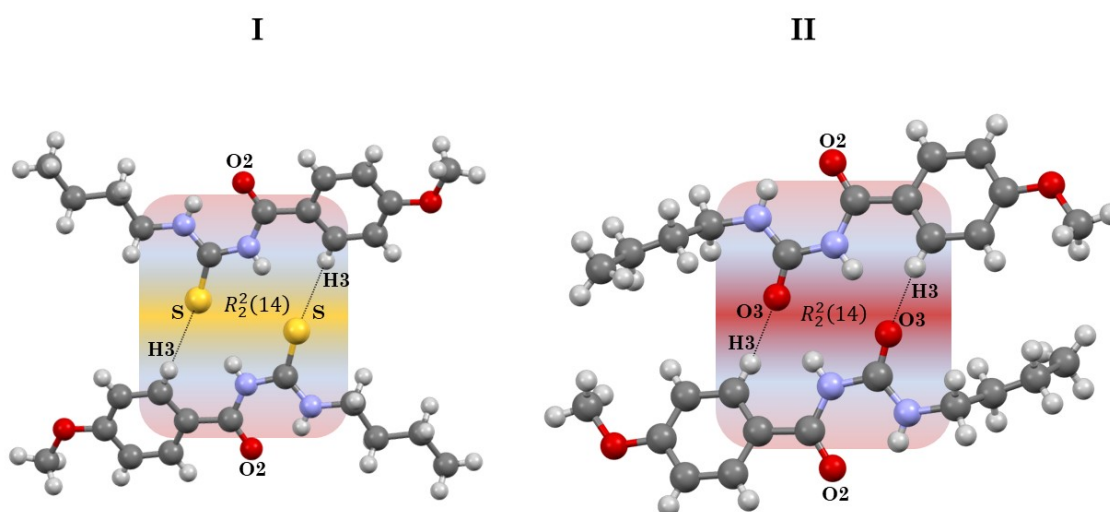

**Figure S8.** Dimers formed by the interaction C3-H3...S in **I** and C3-H3...O3 **II**.

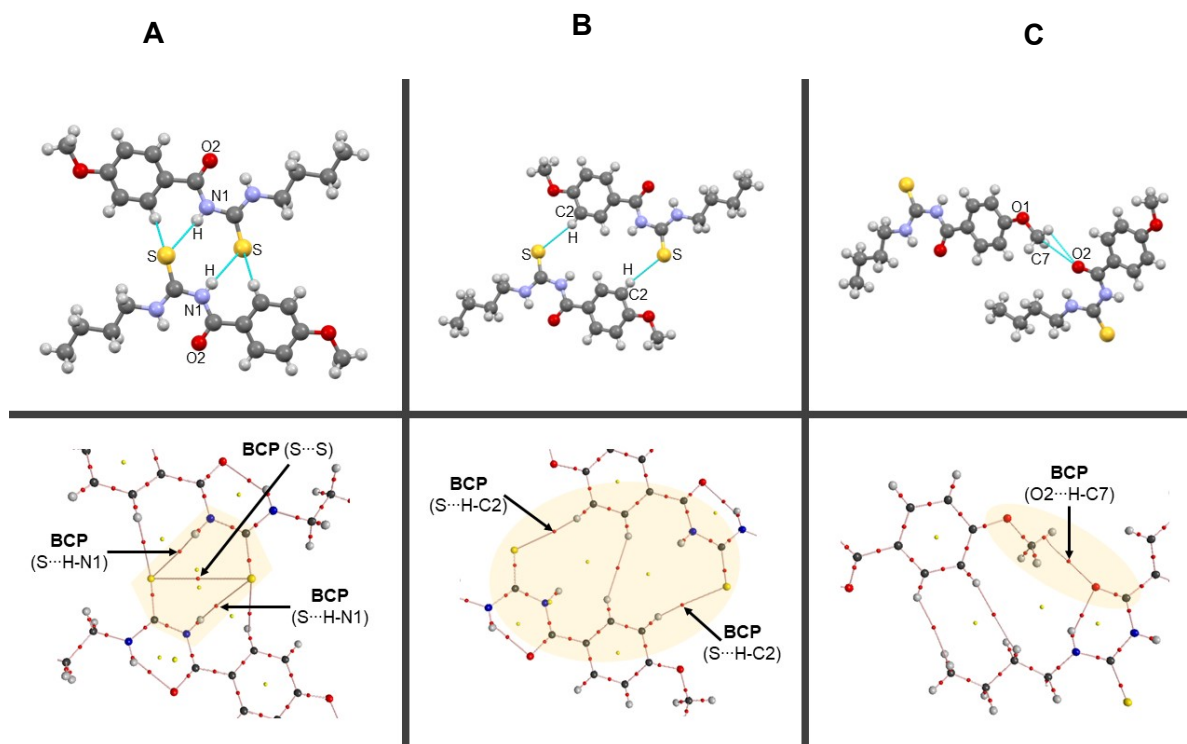

**Figure S9.** Dimers formed by the interaction  $N1-H \cdots S$  (A),  $C2-H2 \cdots S$  (B) and  $C7H_3 \cdots O2$  (C) in I.

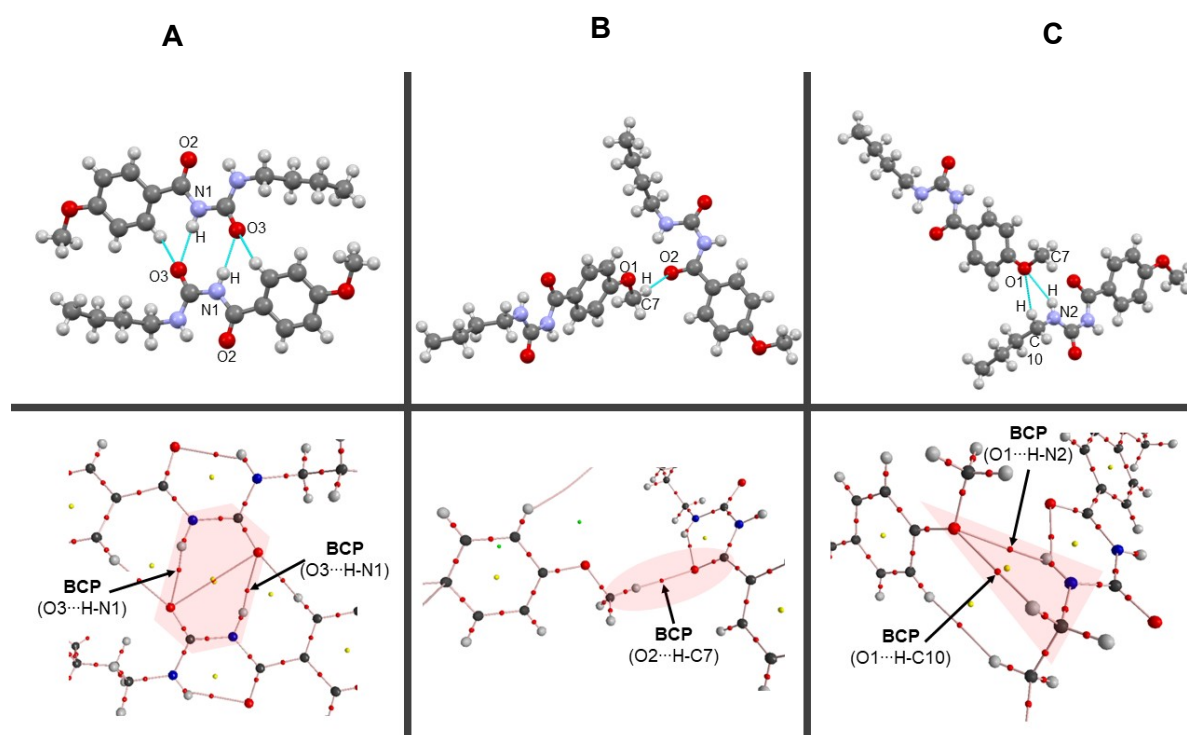

**Figure S10.** Dimers formed by the interaction  $N1-H \cdots O3$  (A),  $C7H_3 \cdots O2$  (B) and  $N2-H2 \cdots O1$  (C) in II.

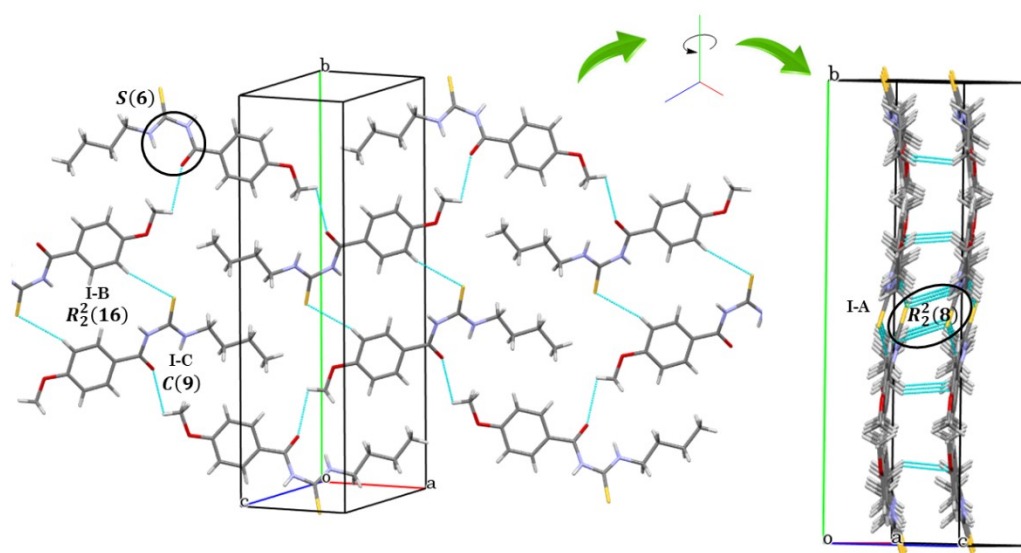

**Figure S11.** Motifs that form sheets in the crystalline packing of **I**.

In addition to the  $R_2^2(8)$  motif associated with the I-A dimer, whose energy contributes to the stabilization of the layers in the packing (see Figure 7),  $S(6)$ ,  $R_2^2(16)$  y  $C(9)$  motifs that form the sheets were identified in the crystalline packing of **I** (see Figure S11). These motifs correspond to the O2C8N1C9N2H pseudo ring, the ring found in the I-B dimer, and the chain established by the C7-H $\cdots$ O2 interaction displayed in the I-C dimer, respectively. These interactions are depicted in Figure S11. The sheets have a small curvature, as shown on the left side of Figure S11.



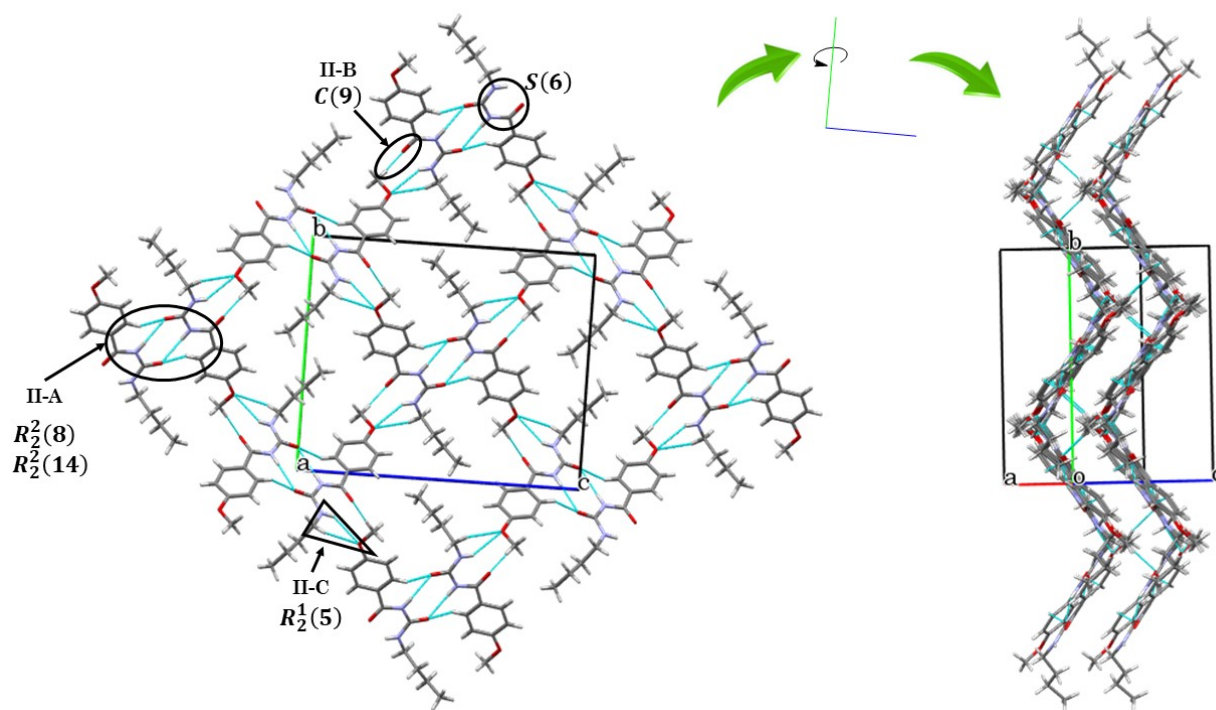

**Figure S12.** Motifs that form sheets in the crystal packing of **II**.

Likewise, motifs S(6) (of the intramolecular hydrogen bond N2H $\cdots$ O2), C(9) (II-B dimer) and  $R_2^1(5)$  (II-C dimer) were identified in **II**. In addition,  $R_2^2(8)$  is observed in dimer II-A, in which the  $R_2^2(14)$  motif is also formed, as shown in Figure S12. In this case, the indicated motifs are oriented in such a way that favor the formation of sheets, now in the zig-zag form, as represented on the right side of figure S12. The lattice energies (calculated as energy Frameworks) are studied later, as well as the interactions that stabilize the formation of layers in the crystal packing of **II**.

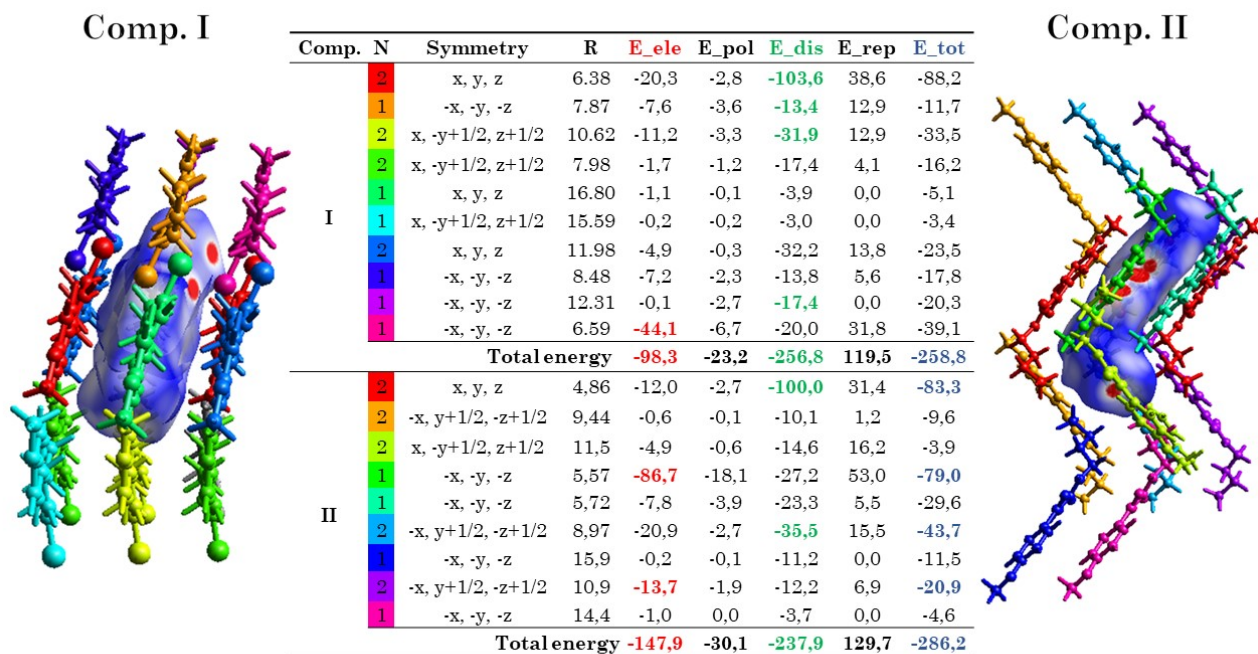

**Figure S13.** Interaction Energies (kJ/mol). Total energies, only reported for two benchmarked energy models, are the sum of the four energy components, scaled appropriately (CE-B3LYP ... B3LYP/6-31G(d,p) electron densities:  $k_{\text{ele}}$ , 1.057;  $k_{\text{pol}}$ , 0.740;  $k_{\text{disp}}$ , 0.871 and  $k_{\text{rep}}$ , 0.618).<sup>1</sup>

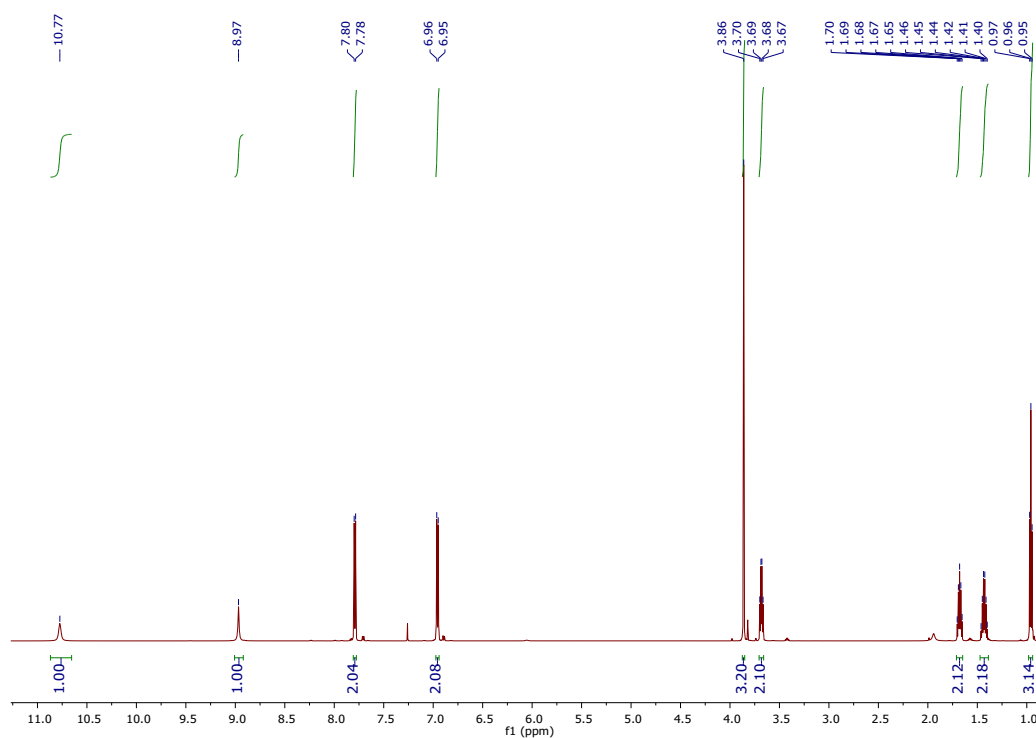

**Figure S14.** <sup>1</sup>H NMR of *N*-(butylcarbamothioyl)-4-methoxybenzamide (I).



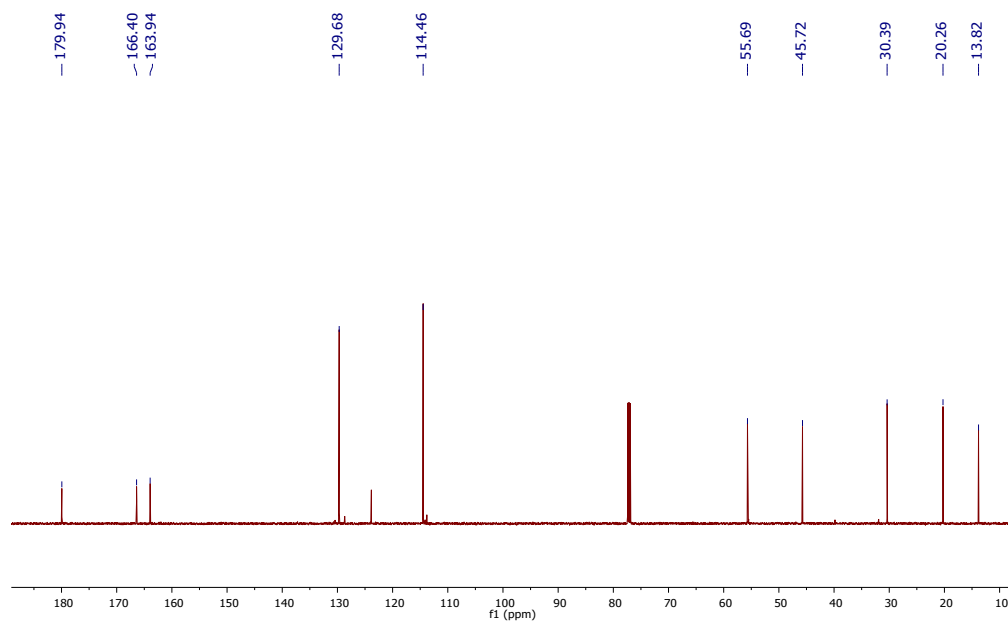

**Figure S15.**  $^{13}\text{C}$  NMR of *N*-(butylcarbamothioyl)-4-methoxybenzamide (**I**).

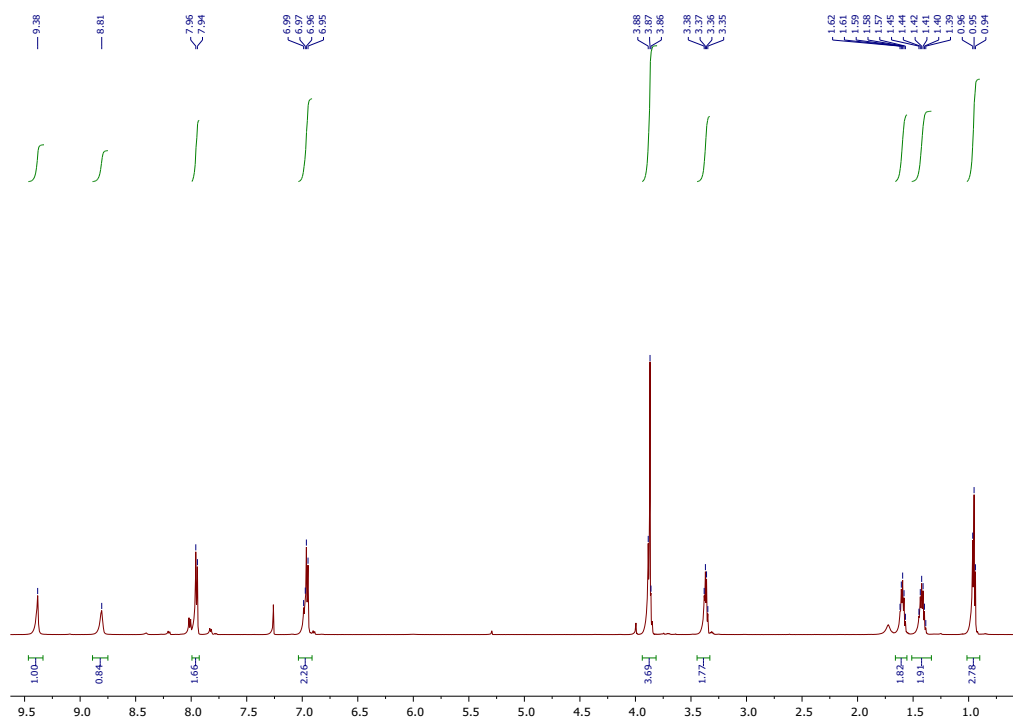

**Figure S16.**  $^1\text{H}$  NMR of *N*-(butylcarbamoyl)-4-methoxybenzamide (**II**).

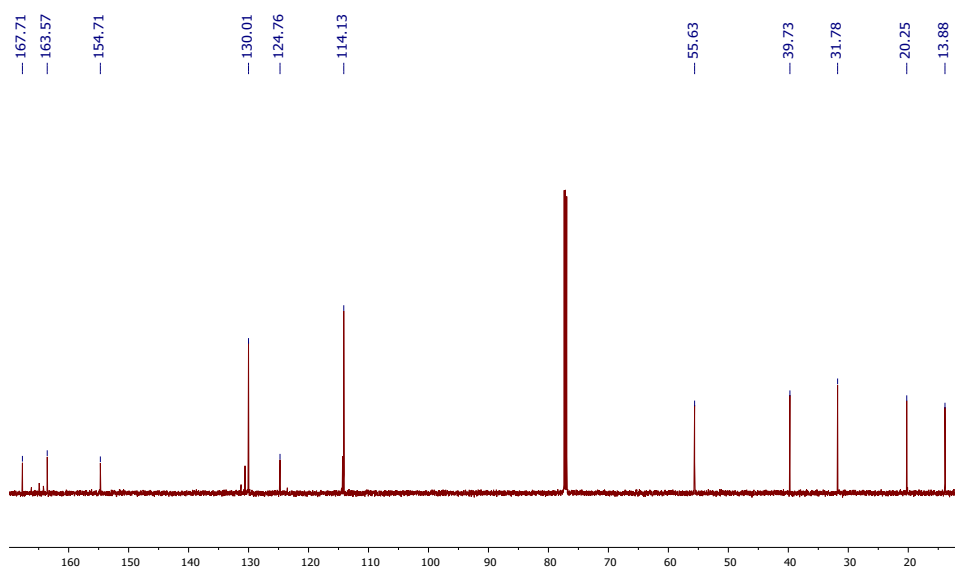

**Figure S17.**  $^{13}\text{C}$  NMR of *N*-(butylcarbamoyl)-4-methoxybenzamide (**II**).

## Reference

- 1 M. A. Spackman, P. R. Spackman and S. P. Thomas, in *Complementary Bonding Analysis*, De Gruyter, 2021, pp. 329–352.
